# Supplementary material for: Prognostic Significance of O-GlcNAc and PKM2 in Hormone Receptor-Positive and HER2-Nonenriched Breast Cancer
Source: MDPI journal article supplement (doi:10.3390/diagnostics11081460), 2021-08-12
Supplement: s1 [file diagnostics-1282274-supplementary.pdf › diagnostics-1282274-supplementary.pdf]

Article

# Prognostic Significance of O-GlcNAc and PKM2 in Hormone Receptor-Positive and HER2-Nonenriched Breast Cancer

This PDF file includes:

Figures S1

Tables S1 to S10

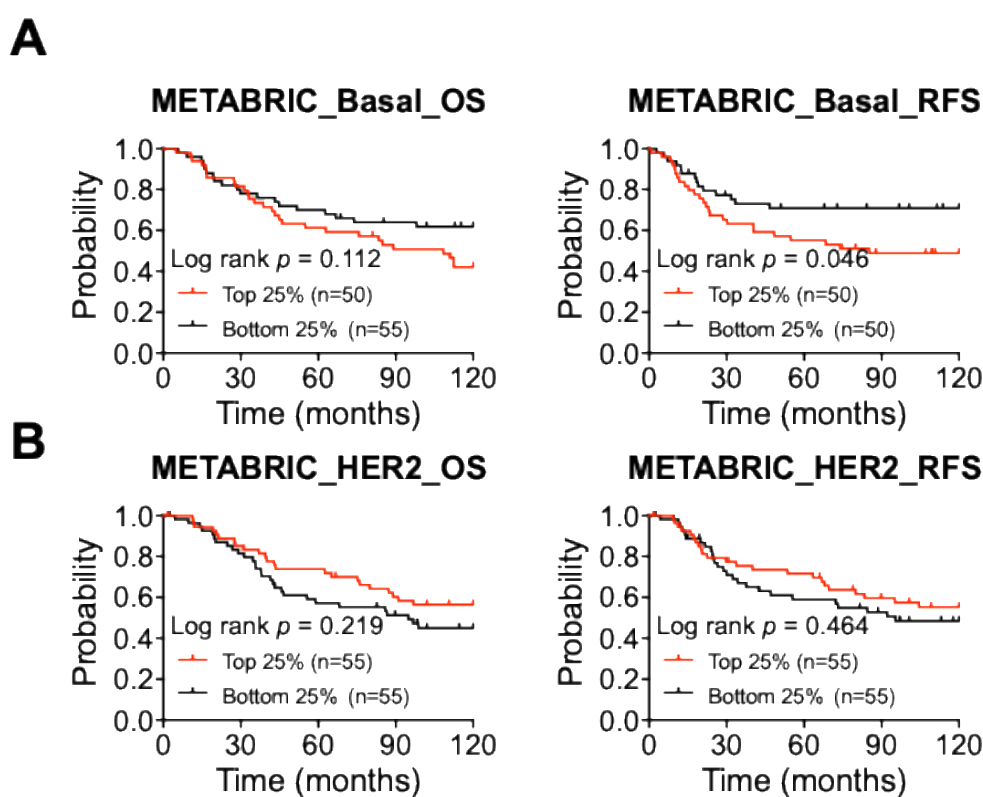

**Figure S1.** Survival analysis of PKM2 basal subtype and HER2-enrich subtype BC. (A–B) Expression of PKM2 is not significantly correlated with 10-year OS and RFS in both basal subtype (A) and HER2-enriched subtype BC. For group comparisons,  $p$  values were determined by log-rank test.

**Table S1.** Spearman's correlation analyses between O-GlcNAc and each of parameters.

| Parameters                 | Correlation analysis - O-GlcNAc (Q) |
|----------------------------|-------------------------------------|
|                            | Correlation Coefficient             |
| Luminal Type               | 0.143                               |
| Age                        | −0.023                              |
| Diabetes mellitus          | 0.043                               |
| Invasive tumor size        | 0.019                               |
| SBR Grade                  | 0.108                               |
| Estrogen receptor (01)     | 0.063                               |
| Estrogen receptor (%)      | −0.021                              |
| Progesterone receptor (01) | 0.109                               |
| Progesterone receptor (%)  | 0.087                               |
| Ki67 index                 | 83 missing values                   |
| T stage                    | 0.055                               |
| N stage                    | −0.119                              |
| Stage                      | −0.079                              |
| PKM2 (Q)                   | 0.190                               |
| CTS5                       | −0.014                              |

**Table S2.** Spearman's correlation analyses between PKM2 and each of parameters.

| Parameters                 | Correlation analysis-PKM2 (Q) |
|----------------------------|-------------------------------|
|                            | Correlation Coefficient       |
| Luminal Type               | −0.129                        |
| Age                        | 0.089                         |
| Diabetes mellitus          | −0.090                        |
| Invasive tumor size        | −0.293                        |
| SBR Grade                  | −0.204                        |
| Estrogen receptor (01)     | −0.021                        |
| Estrogen receptor (%)      | 0.116                         |
| Progesterone receptor (01) | 0.149                         |
| Progesterone receptor (%)  | 0.107                         |
| Ki67 index                 | 83 missing values             |
| T stage                    | −0.225                        |
| N stage                    | −0.141                        |
| Stage                      | −0.229                        |
| O-GlcNAc (Q)               | 0.190                         |
| CTS5                       | −0.249                        |

**Table S3.** Spearman's correlation analyses between CTS5 and each of parameters.

| Parameters                 | Correlation analysis-CTS5 |
|----------------------------|---------------------------|
|                            | Correlation Coefficient   |
| Luminal Type               | 0.409                     |
| Age                        | 0.172                     |
| Diabetes mellitus          | 0.079                     |
| Invasive tumor size        | 0.747                     |
| SBR Grade                  | 0.499                     |
| Estrogen receptor (01)     | 0.043                     |
| Estrogen receptor (%)      | −0.122                    |
| Progesterone receptor (01) | −0.141                    |
| Progesterone receptor (%)  | −0.318                    |
| Ki67 index                 | 83 missing values         |
| T stage                    | 0.679                     |
| N stage                    | 0.736                     |
| Stage                      | 0.792                     |
| O-GlcNAc (Q)               | −0.014                    |
| PKM2 (Q)                   | −0.249                    |

**Table S4.** Univariate Cox regression analysis to DFS.

| Parameters                | Univariate analysis |                     |         |
|---------------------------|---------------------|---------------------|---------|
|                           | Coefficient         | HR (95% CI)         | p-value |
| Luminal Type (A vs. B)    | −0.119              | 1.126 (0.615–2.064) | 0.700   |
| Age                       | 0.007               | 1.007 (0.982–1.033) | 0.572   |
| Diabetes mellitus         | −0.383              | 0.682 (0.270–1.718) | 0.416   |
| Invasive tumor size       | 0.215               | 1.239 (1.035–1.485) | 0.020   |
| SBR Grade                 | −0.051              | 0.950 (0.603–1.498) | 0.232   |
| Estrogen receptor (%)     | <0.001              | 1.000 (0.991–1.009) | 0.995   |
| Progesterone receptor (%) | −0.002              | 0.998 (0.990–1.007) | 0.697   |
| Ki67 index (%)            |                     | 83 missing values   |         |
| T stage                   | 0.655               | 1.925 (1.238–2.991) | 0.004   |
| N stage                   | 0.096               | 1.101 (0.804–1.507) | 0.549   |
| Stage                     | 0.286               | 1.331 (0.888–1.995) | 0.166   |
| O-GlcNAc                  | 0.007               | 1.007 (1.004–1.011) | <0.001  |
| PKM2                      | 0.003               | 1.003 (1.000–1.006) | 0.048   |
| CTS5                      | 0.258               | 1.294 (0.944–1.774) | 0.109   |

**Table S5.** Multivariate Cox regression analysis of invasive tumor size, O-GlcNAc, and PKM2 for DFS.

| Parameters          | Multivariate analysis |                     |         |
|---------------------|-----------------------|---------------------|---------|
|                     | Coefficient           | HR (95% CI)         | p-value |
| Invasive tumor size | 0.293                 | 1.340 (1.106–1.623) | 0.003   |
| O-GlcNAc            | 0.006                 | 1.006 (1.002–1.010) | 0.002   |
| PKM2                | 0.003                 | 1.003 (1.000–1.007) | 0.061   |

**Table S6.** Multivariate Cox regression analysis of T stage, O-GlcNAc, and PKM2 for DFS.

| Parameters | Multivariate analysis |                     |                 |
|------------|-----------------------|---------------------|-----------------|
|            | Coefficient           | HR (95% CI)         | <i>p</i> -value |
| T stage    | 0.785                 | 2.193 (1.376–3.495) | <0.001          |
| O-GlcNAc   | 0.006                 | 1.006 (1.002–1.009) | 0.003           |
| PKM2       | 0.003                 | 1.002 (1.000–1.007) | 0.055           |

**Table S7.** Multivariate Cox regression analysis of CTS5, O-GlcNAc, and PKM2 for DFS.

| Parameters | Multivariate analysis |                     |                 |
|------------|-----------------------|---------------------|-----------------|
|            | Coefficient           | HR (95% CI)         | <i>p</i> -value |
| CTS5       | 0.308                 | 1.360 (0.986–1.877) | 0.061           |
| O-GlcNAc   | 0.006                 | 1.006 (1.002–1.010) | 0.003           |
| PKM2       | 0.003                 | 1.003 (0.999–1.006) | 0.125           |

**Table S8.** Logistic regression analysis of CTS5, O-GlcNAc, and PKM2 for DFS.

|              | Coefficient | SE    | <i>p</i> -value |
|--------------|-------------|-------|-----------------|
| CTS5         | 0.525       | 0.215 | 0.018           |
| O-GlcNAc (Q) | 0.007       | 0.003 | 0.018           |
| PKM2 (Q)     | 0.005       | 0.002 | 0.028           |
| Constant     | −3.883      | 1.002 | <0.001          |

**Table S9.** Logistic regression analysis of invasive tumor size, O-GlcNAc, and PKM2 for DFS.

|                     | Coefficient | SE    | <i>p</i> -value |
|---------------------|-------------|-------|-----------------|
| Invasive tumor size | 0.356       | 0.135 | 0.008           |
| O-GlcNAc (Q)        | 0.007       | 0.003 | 0.025           |
| PKM2 (Q)            | 0.005       | 0.002 | 0.018           |
| Constant            | −2.968      | 0.663 | <0.001          |

**Table S10.** Logistic regression analysis of T stage, O-GlcNAc and PKM2 for DFS.

|              | Coefficient | SE    | <i>p</i> -value |
|--------------|-------------|-------|-----------------|
| T stage      | 1.006       | 0.316 | 0.001           |
| O-GlcNAc (Q) | 0.007       | 0.003 | 0.032           |
| PKM2 (Q)     | 0.005       | 0.002 | 0.014           |
| Constant     | −3.757      | 0.808 | <0.001          |
